# Supplementary material for: White-Tailed Eagles’ (Haliaeetus albicilla) Exposure to Anticoagulant Rodenticides and Causes of Poisoning in Poland (2018–2020)
Source: MDPI journal article supplement (doi:10.3390/toxics10020063), 2022-02-01
Supplement: s1 [file s1]

# Supplementary Materials: White-tailed eagles' (*Haliaeetus albicilla*) exposure to anticoagulant rodenticides and causes of poisoning in Poland (2018–2020)

Bartosz Sell, Tomasz Śniegocki, Marta Giergiel and Andrzej Posylniak

**Table S1.** Additional information and findings from samples of white-tailed eagles (*Haliaeetus albicilla*) samples tested in years 2018–2020 in Poland in cases of suspected poisonings.

| Year | ID  | Concentration<br>(µg/kg, w.w.) |            | Anatomopathological<br>lesions / observations <sup>a</sup> |          | Age /<br>Sex <sup>b</sup> | Additional<br>findings <sup>c</sup> | Period of<br>Year | Probable reason<br>of death |
|------|-----|--------------------------------|------------|------------------------------------------------------------|----------|---------------------------|-------------------------------------|-------------------|-----------------------------|
|      |     | Bendiocarb                     | Carbofuran | Autopsy                                                    | Sampling |                           |                                     |                   |                             |
| 2018 | #1  |                                | 473.1      | nd                                                         | nd       | nd                        | B                                   | winter            | carbofuran                  |
|      | #2  |                                | 825.8      | nd                                                         | BCD, CIO | nd                        |                                     | winter            | carbofuran                  |
|      | #3  |                                | 133.5      | nd                                                         | nd       | nd                        |                                     | winter            | carbofuran                  |
|      | #4  |                                | 789.4      | nd                                                         | BCD, CIO | nd                        |                                     | winter            | carbofuran                  |
|      | #5  |                                |            | nd                                                         | nd       | nd                        |                                     | winter            | not identified              |
|      | #6  |                                |            | nd                                                         | PD       | nd                        |                                     | spring            | not identified              |
|      | #7  |                                | 491.6      | nd                                                         | PD       | nd                        | OS                                  | spring            | carbofuran                  |
|      | #8  |                                | 403.2      | nd                                                         | PD       | nd                        | OS                                  | spring            | carbofuran                  |
|      | #9  |                                | 238.9      | nd                                                         | PD       | nd                        | OS                                  | spring            | carbofuran                  |
|      | #10 |                                |            | nd                                                         | nd       | nd                        |                                     | winter            | not identified              |
|      | #11 |                                | 569        | nd                                                         | CIO, BCO | nd                        |                                     | autumn            | carbofuran                  |
|      | #12 |                                | 387        | nd                                                         | CIO, BCO | nd / M                    | OS                                  | autumn            | carbofuran                  |
|      | #13 |                                | 409        | nd                                                         | BCD      | nd / F                    | OS                                  | autumn            | carbofuran                  |
| 2019 | #14 |                                | 39.8       | nd                                                         | nd       | nd                        |                                     | winter            | carbofuran                  |
|      | #15 |                                |            | BCD, CIO                                                   |          | J / M                     |                                     | winter            | anticoagulants              |
|      | #16 |                                | 386        | CIO, BCO                                                   |          | nd / F                    |                                     | winter            | carbofuran                  |
|      | #17 |                                | 2707       | nd                                                         | PD, BCO  | nd                        |                                     | winter            | carbofuran                  |
|      | #18 | 5733                           |            | nd                                                         | CIO, BCO | nd                        |                                     | winter            | bendiocarb                  |
|      | #19 |                                |            | nd                                                         | BCD      | nd                        |                                     | winter            | anticoagulants              |
|      | #20 | 19487                          |            | nd                                                         | BCD, CIO | A / F                     | OS                                  | spring            | bendiocarb                  |
|      | #21 |                                | 178        | nd                                                         | nd       | A / nd                    |                                     | summer            | carbofuran                  |
| 2020 | #22 |                                | 222        | nd                                                         | nd       | nd                        |                                     | autumn            | carbofuran                  |
|      | #23 |                                | 422        | CIO                                                        |          | J / F                     |                                     | winter            | carbofuran                  |
|      | #24 | 2722                           |            | CIO                                                        |          | A / M                     |                                     | winter            | bendiocarb                  |
|      | #25 | 3579                           |            | CIO                                                        |          | J / F                     |                                     | winter            | bendiocarb                  |
|      | #26 | 17935                          |            | CIO                                                        |          | J / F                     |                                     | winter            | bendiocarb                  |
|      | #27 |                                |            | CIO, BCO                                                   |          | A / M                     |                                     | winter            | not identified              |
|      | #28 |                                | 137        | CIO                                                        |          | A / M                     |                                     | winter            | carbofuran                  |
|      | #29 |                                | 61.4       | BCD, CIO                                                   |          | A / nd                    |                                     | winter            | carbofuran                  |
|      | #30 |                                |            | BCD                                                        |          | A / F                     |                                     | winter            | anticoagulants              |
|      | #31 |                                | 1404       | nd                                                         | CIO      | nd                        |                                     | winter            | carbofuran                  |
|      | #32 |                                | 52.3       | nd                                                         | PD       | nd                        |                                     | winter            | carbofuran                  |
|      | #33 |                                | 292        | nd                                                         | nd       | nd                        |                                     | winter            | carbofuran                  |
|      | #34 |                                |            | nd                                                         | BCD      | A / F                     |                                     | spring            | anticoagulants              |
|      | #35 |                                | 19         | nd                                                         | nd       | nd                        | OS                                  | spring            | carbofuran                  |
|      | #36 |                                | 727        | nd                                                         | BCD, CIO | nd                        |                                     | spring            | carbofuran                  |
|      | #37 |                                | 122        | nd                                                         | nd       | nd                        | OS                                  | spring            | carbofuran                  |
|      | #38 |                                | 5211       | nd                                                         | CIO      | J / M                     |                                     | spring            | carbofuran                  |
|      | #39 |                                | 5428       | nd                                                         | CIO      | J / F                     |                                     | spring            | carbofuran                  |
|      | #40 |                                | 3122       | nd                                                         | CIO      | A / M                     |                                     | spring            | carbofuran                  |

<sup>a</sup> **BCD** – blood clotting disorders; **BCO** - blood clots were observed **CIO** - congestion of internal organs; **nd** - no data; **PD** - partially decaying;

<sup>b</sup> **A** – adult >3 years; **J** – juvenile < 3 years; **M** - male; **F** – female; **nd** - no data;

<sup>c</sup> **B** – birds founded nearby probable bait, **OS** – birds found near more dead animals of other species;
